# Supplementary material for: Network Pharmacology-Based Approach to Investigate the Analgesic Efficacy and Molecular Targets of Xuangui Dropping Pill for Treating Primary Dysmenorrhea
Source: Evid Based Complement Alternat Med. 2017 Oct 8;2017:7525179. doi: 10.1155/2017/7525179 (PMC5651156; doi:10.1155/2017/7525179)
Supplement: Supplementary file 1 — Supplementary 1 displays the information of 350 compounds in Xuangui Dropping Pill. Supplementary 2 shows the information of the 55 compounds and 1143 targets of Xuangui Droping Pill. [file 7525179.f1.xls]

## Sheet: Sheet1
Mol ID	Molecule Name	OB (%)	DL	herbs
MOL001	PHB	30.15	0.03	CR
MOL002	vanillic acid	35.47	0.04	CR
MOL003	berberine	36.86	0.78	CR
MOL004	columbamine	26.94	0.59	CR
MOL005	coptisine	30.67	0.86	CR
MOL006	Cryptopin	78.74	0.72	CR
MOL007	Dihydrochelerythrine	32.73	0.81	CR
MOL008	Dihydrosanguinarine	59.31	0.86	CR
MOL009	sanguinarine	37.81	0.86	CR
MOL010	10-nonacosanol	11.33	0.45	CR
MOL011	(S)-Scoulerine	32.28	0.54	CR
MOL012	Cavidine	35.64	0.81	CR
MOL013	Noroxyhydrastinine	38.89	0.1	CR
MOL014	(R)-Canadine	55.37	0.77	CR
MOL015	Docosanoate	15.69	0.26	CR
MOL016	tetrahydropalmatine	73.94	0.64	CR
MOL017	(-)-alpha-N-methylcanadine	45.06	0.8	CR
MOL018	Capaurine	62.91	0.69	CR
MOL019	caseanidine	25.21	0.59	CR
MOL020	Clarkeanidine	86.65	0.54	CR
MOL021	corybulbine	26.13	0.62	CR
MOL022	CORYDALINE	65.84	0.68	CR
MOL023	Corydalmine	52.5	0.59	CR
MOL024	Corydine	37.16	0.55	CR
MOL025	18797-79-0	46.06	0.85	CR
MOL026	Corynoloxine	38.12	0.6	CR
MOL027	methyl-[2-(3,4,6,7-tetramethoxy-1-phenanthryl)ethyl]amine	61.15	0.44	CR
MOL028	4H-Dibenzo(de,g)quinoline-1,11-diol, 5,6,6a,7-tetrahydro-2,10-dimethoxy-6-methyl-, (S)-	24.95	0.51	CR
MOL029	dehydrocavidine	38.99	0.81	CR
MOL030	Dehydrocorybulbine	46.97	0.63	CR
MOL031	dehydrocorydaline	41.98	0.68	CR
MOL032	Dehydrocorydalmine	43.9	0.59	CR
MOL033	Dehydroglaucine	25.91	0.61	CR
MOL034	Dehydronantenine	28.34	0.75	CR
MOL035	demethylcorydalmatine	38.99	0.54	CR
MOL036	13-methyldehydrocorydalmine	35.94	0.63	CR
MOL037	(1S,8'R)-6,7-dimethoxy-2-methylspiro[3,4-dihydroisoquinoline-1,7'-6,8-dihydrocyclopenta[g][1,3]benzodioxole]-8'-ol	43.95	0.72	CR
MOL038	Glauvent	29.03	0.61	CR
MOL039	Streptomycin C	14.54	0.73	CR
MOL040	Izoteolin	39.53	0.51	CR
MOL041	isocorybulbine	40.18	0.66	CR
MOL042	leonticine	45.79	0.26	CR
MOL043	13-methylpalmatrubine	40.97	0.63	CR
MOL044	Micheline B	14.83	0.53	CR
MOL045	31098-60-9	24.72	0.89	CR
MOL046	Nantenin	25.49	0.74	CR
MOL047	N-methyllaurotetanine	41.62	0.56	CR
MOL048	norglaucing	30.35	0.56	CR
MOL049	Oxoglaucine	26.61	0.62	CR
MOL050	18797-80-3	20.03	0.8	CR
MOL051	pontevedrine	30.28	0.71	CR
MOL052	pseudocoptisine	38.97	0.86	CR
MOL053	24240-05-9	53.75	0.83	CR
MOL054	Sanguidimerine	28.76	0.02	CR
MOL055	saulatine	42.74	0.79	CR
MOL056	Spallidamine	4.86	0.83	CR
MOL057	stylopine	48.25	0.85	CR
MOL058	Tetrahydrocorysamine	34.17	0.86	CR
MOL059	tetrahydroprotopapaverine	57.28	0.33	CR
MOL060	ST057701	31.87	0.56	CR
MOL061	2,3,9,10-tetramethoxy-13-methyl-5,6-dihydroisoquinolino[2,1-b]isoquinolin-8-one	76.77	0.73	CR
MOL062	104387-15-7	24.87	0.63	CR
MOL063	emodin	24.4	0.24	CR
MOL064	Physcion	22.29	0.27	CR
MOL065	palmatine	64.6	0.65	CR
MOL066	STOCK1N-14407	22.28	0.64	CR
MOL067	Fumarine	59.26	0.83	CR
MOL068	Isocorypalmine	35.77	0.59	CR
MOL069	bicuculline	69.67	0.88	CR
MOL070	Fagarine I	25.53	0.72	CR
MOL071	C09367	47.54	0.69	CR
MOL072	quercetin	46.43	0.28	CR
MOL073	Nonanal	40.28	0.02	ASR
MOL074	Loxanol V	14.19	0.05	ASR
MOL075	Tridecylene	17.69	0.03	ASR
MOL076	80-57-9	50.63	0.06	ASR
MOL077	Usaf hc-1	16.23	0.05	ASR
MOL078	o-Acetyl-p-cresol	24.96	0.03	ASR
MOL079	Azelex	16.9	0.04	ASR
MOL080	(+)-Ledol	16.96	0.12	ASR
MOL081	Hypnon	48.19	0.02	ASR
MOL082	beta-Chamigrene	31.99	0.08	ASR
MOL083	NON	26.74	0.03	ASR
MOL084	adenine	62.81	0.03	ASR
MOL085	Safrol	45.34	0.05	ASR
MOL086	()-Cuparene	38.26	0.07	ASR
MOL087	cis-Thujopsene	56.43	0.12	ASR
MOL088	isoeugenol	70.1	0.04	ASR
MOL089	3-Butylidene-7-hydroxyphthalide	62.68	0.08	ASR
MOL090	Levistolid A	2.15	0.82	ASR
MOL091	Allocymene	14.89	0.02	ASR
MOL092	BdPh	42.44	0.07	ASR
MOL093	senkyunolide-C	46.8	0.08	ASR
MOL094	senkyunolide-D	79.13	0.1	ASR
MOL095	senkyunolide-E	34.4	0.08	ASR
MOL096	4-Octanone	19.37	0.01	ASR
MOL097	(6R)-6-butylcyclohepta-1,4-diene	31.69	0.02	ASR
MOL098	cis-ligustilide	51.3	0.07	ASR
MOL099	()-alpha-Terpineol	46.3	0.03	ASR
MOL100	o-Thymol	43.28	0.03	ASR
MOL101	CHEBI:7	45.2	0.04	ASR
MOL102	PCR	51.99	0.01	ASR
MOL103	(4S)-1-methyl-4-(6-methylhepta-1,5-dien-2-yl)cyclohexene	20.3	0.06	ASR
MOL104	Guasol	51.6	0.02	ASR
MOL105	IPH	36.05	0.01	ASR
MOL106	succinic acid	29.62	0.01	ASR
MOL107	beta-Selinene	24.39	0.08	ASR
MOL108	CADINENE	17.12	0.08	ASR
MOL109	Acoradiene	36.73	0.07	ASR
MOL110	FER	39.56	0.06	ASR
MOL111	D-Galacturonic acid, homopolymer	29.75	0.04	ASR
MOL112	FERULIC ACID (CIS)	54.97	0.06	ASR
MOL113	Scopoletol	27.77	0.08	ASR
MOL114	nicotinic acid	47.65	0.02	ASR
MOL115	Maruzen M	48.44	0.02	ASR
MOL116	o-cresol	62.45	0.02	ASR
MOL117	6,7,3',8'-diligustilide	9.83	0.7	ASR
MOL118	beta-Terpinene	42.29	0.02	ASR
MOL119	Butal	68.66	0	ASR
MOL120	Eucarvone	53.14	0.03	ASR
MOL121	Ethol	13.32	0.08	ASR
MOL122	ANN	29.69	0.03	ASR
MOL123	h-Met-h	70.87	0.01	ASR
MOL124	Stigmasterol	43.83	0.76	ASR/CR
MOL125	3,4-DIMETHYLBENZALDEHYDE	39.99	0.02	ASR
MOL126	ETHYLBENZALDEHYDE	40.95	0.02	ASR
MOL127	TMHYDROP	54.42	0.03	ASR
MOL128	vanillin	52	0.03	ASR
MOL129	bicycloelemene	20.89	0.08	ASR
MOL130	WLN: QR CQ DV1	36.49	0.03	ASR
MOL131	WLN: VH6	19.59	0.01	ASR
MOL132	WLN: QVR BVQ	17.74	0.04	ASR
MOL133	(1R,2S,4R)-1-ethyl-1-methyl-2,4-bis(1-methylethyl)cyclohexane	15.01	0.06	ASR
MOL134	DODECENE	17.74	0.02	ASR
MOL135	phosphatdic acid	19.32	0.05	ASR
MOL136	L-beta,gamma-Dimyristoyl-alpha-cephalin	20.69	0.47	ASR
MOL137	phosphatidylinositol	4.63	0.29	ASR
MOL138	phosphatidylinositol_qt	12.66	0.05	ASR
MOL139	ESEN	47.31	0.04	ASR
MOL140	sedanolide	62.46	0.07	ASR
MOL141	senkyunolide	68.28	0.07	ASR
MOL142	sphingomyelin	0.31	0.51	ASR
MOL143	Isotetandrine	10.42	0.1	ASR
MOL144	α-acoradiene	40.98	0.07	ASR
MOL145	InChI=1/C15H24/c1-10-7-8-15-9-12(10)14(3,4)13(15)6-5-11(15)2/h7,11-13H,5-6,8-9H2,1-4H	55.56	0.1	ASR
MOL146	α-copaene	29.33	0.12	ASR
MOL147	(1R,4R,5S)-4-isopropenyl-1,8-dimethylspiro[4.5]dec-8-ene	40.65	0.07	ASR
MOL148	2,6-di(phenyl)thiopyran-4-thione	69.13	0.15	ASR
MOL149	o-Xylenol	53.13	0.02	ASR
MOL150	2,4,6-trimethyl-Octane	29.14	0.02	ASR
MOL151	Mesitaldehyde	37.8	0.03	ASR
MOL152	Isoxylaldehyde	38.85	0.02	ASR
MOL153	(E)-octadec-3-ene	19.5	0.09	ASR
MOL154	2-valerylbenzoic acid	78.26	0.06	ASR
MOL155	(Z)-2-Hexenyl hexanoate	19.39	0.04	ASR
MOL156	2-Methylhexadecanoic acid	20.23	0.11	ASR
MOL157	cis-Isoeugenol	20.73	0.04	ASR
MOL158	2-methyl-5-decanone	20.4	0.11	ASR
MOL159	2-methyldodecan-5-one	13.16	0.04	ASR
MOL160	3,7-dimethyl-nonane	16.97	0.02	ASR
MOL161	1,1,5-trimethyl-2-formylcyclohexa-2,5-diene-4-one	48.94	0.04	ASR
MOL162	4-Methyl-6-hepten-3-one	78.38	0.01	ASR
MOL163	6-Ethylresorcinol	46.45	0.03	ASR
MOL164	5-Indolol	63.14	0.03	ASR
MOL165	Undecanol-6	25.77	0.02	ASR
MOL166	7,10-PENTADECADIYNOIC ACID	41.5	0.09	ASR
MOL167	4-chloro-N-[1-methyl-5-[[1-methyl-5-[[1-methyl-5-(2-morpholinoethylcarbamoyl)pyrrol-3-yl]carbamoyl]pyrrol-3-yl]carbamoyl]pyrrol-3-yl]-5-[2-(2-pyridyl)ethylamino]isothiazole-3-carboxamide	7.18	0.31	ASR
MOL168	Amyl ketone	18.65	0.02	ASR
MOL169	Isoamylbenzene	35.69	0.03	ASR
MOL170	(Z)-2-[[(Z)-2-methylbut-2-enoyl]oxymethyl]but-2-enoic acid	77.1	0.04	ASR
MOL171	Tropone	47.41	0.01	ASR
MOL172	aromadendrene	18.21	0.1	ASR
MOL173	BUA	21.62	0	ASR
MOL174	(3S)-3-butyl-3H-isobenzofuran-1-one	55.05	0.07	ASR
MOL175	()-Camphoric acid	99.13	0.07	ASR
MOL176	(3E)-3-butylidene-7-hydroxy-2-benzofuran-1-one	42.17	0.08	ASR
MOL177	Coniferyl ferulate	4.54	0.39	ASR
MOL178	lecithin	0.31	0.4	ASR
MOL179	2,4-Xylylaldehyde	39.33	0.03	ASR
MOL180	m-Ethylphenol	51.3	0.02	ASR
MOL181	1,5,5,6-tetramethyl-1,3-Cyclohexadiene	39.22	0.03	ASR
MOL182	Dodekan	17.74	0.02	ASR
MOL183	bergamotene	28.51	0.09	ASR
MOL184	cuminal	38.29	0.03	ASR
MOL185	5-isopropyl-2-methylbicyclo[3.1.0]hex-2-ene	47.19	0.04	ZR
MOL186	19894-97-4	49.98	0.06	ZR
MOL187	Cymol	27.2	0.02	ZR/ASR
MOL188	(L)-alpha-Terpineol	48.8	0.03	ZR
MOL189	ZINC02040970	40.43	0.06	ZR
MOL190	(1R,5R,7S)-4,7-dimethyl-7-(4-methylpent-3-enyl)bicyclo[3.1.1]hept-3-ene	16.23	0.09	ZR
MOL191	Decanal	29.81	0.02	ZR/ASR
MOL192	(4S)-4-isopropylcyclohexene-1-carbaldehyde	40.36	0.03	ZR
MOL193	1,8-cineole	39.73	0.05	ZR
MOL194	geraniol	23.93	0.02	ZR
MOL195	citral	22.52	0.02	ZR
MOL196	(-)-alpha-Pinene	46.25	0.05	ZR/ASR
MOL197	(-)-nopinene	44.84	0.05	ZR
MOL198	Neral	19.48	0.02	ZR
MOL199	NERYLACETATE	25.94	0.04	ZR
MOL200	EIC	41.9	0.14	ZR/CR
MOL201	Oktadekan	9.81	0.09	ZR
MOL202	PENTADECYLIC ACID	20.18	0.08	ZR
MOL203	UPL	8.52	0.11	ZR
MOL204	guaiene	28.21	0.07	ZR
MOL205	2-[(2S,5R)-5-ethenyl-5-methyloxolan-2-yl]propan-2-ol	68.08	0.04	ZR
MOL206	(+/-)-Isoborneol	86.98	0.05	ZR
MOL207	ZINC02169908	23.3	0.1	ZR
MOL208	D-Camphene	34.98	0.04	ZR
MOL209	L-Bornyl acetate	65.52	0.08	ZR
MOL210	Myrcene	24.96	0.02	ZR/ASR
MOL211	(R)-linalool	39.8	0.02	ZR
MOL212	(S)-(+)-alpha-Phellandrene	27.9	0.02	ZR
MOL213	p-Ocimene	15.06	0.02	ZR/ASR
MOL214	Moslene	33.02	0.02	ZR/ASR
MOL215	(+)-beta-Phellandrene	40.3	0.02	ZR
MOL216	-cis-.beta.-Elemene diastereomer	28.62	0.06	ZR
MOL217	alpha-Cubebene	16.73	0.11	ZR
MOL218	3-cyclohexen-1-ol	70.57	0.01	ZR
MOL219	Hemo-sol	39.84	0.02	ZR/ASR
MOL220	Terragon	36.59	0.03	ZR
MOL221	()-Borneol	81.8	0.05	ZR
MOL222	(+)-1,5-Epoxy-nor-ketoguaia-11-ene	62.84	0.12	ZR
MOL223	β-humulene	40.36	0.05	ZR
MOL224	β-sesquiphellandrene	16.2	0.06	ZR
MOL225	(-)-Comphene	34.98	0.04	ZR
MOL226	10-Gingerdione	21.42	0.29	ZR
MOL227	[(3S)-3,7-dimethyloct-6-enyl] acetate	22.68	0.04	ZR
MOL228	[(3R)-3,7-dimethyloct-6-enyl] butanoate	21.03	0.06	ZR
MOL229	Cyclopropyl ketone	62.18	0.02	ZR
MOL230	ZINC01850974	78.86	0.05	ZR
MOL231	(S)-5-Hydroxy-1-(4-hydroxy-3-methoxyphenyl)-3-tetradecanone	19.14	0.28	ZR
MOL232	12,13-Di-acetoxyl-1,4,6,11-eudesmanetetol	17.51	0.34	ZR
MOL233	Gingerglycolipid A	13.62	0.47	ZR
MOL234	gingerglycolipid A_qt	11.71	0.64	ZR
MOL235	[(2S)-2-hydroxy-3-[(2R,3R,4S,5R,6R)-3,4,5-trihydroxy-6-[[(2S,3R,4S,5R,6R)-3,4,5-trihydroxy-6-(hydroxymethyl)tetrahydropyran-2-yl]oxymethyl]tetrahydropyran-2-yl]oxy-propyl] (9Z,12Z)-octadeca-9,12-dienoate	22.78	0.4	ZR
MOL236	1-Monolinolein	37.18	0.3	ZR
MOL237	9-Octadecenoic acid (Z)-, 3-((6-O-alpha-D-galactopyranosyl-beta-D-galactopyranosyl)oxy)-2-hydroxypropyl ester, (S)-	10.02	0.48	ZR
MOL238	gingerglycolipid C_qt	9.93	0.62	ZR
MOL239	6-gingerol	35.64	0.16	ZR
MOL240	hexahydrocurcumin	4.88	0.41	ZR
MOL241	12-Gingerol	17.81	0.37	ZR
MOL242	(Z,Z)-farnesol	41.14	0.06	ZR
MOL243	Isogingerenone-B	3.8	0.46	ZR
MOL244	[(1R,2R,5R)-2-isopropyl-5-methyl-cyclohexyl] acetate	22.19	0.05	ZR
MOL245	Neryl propionate	36.64	0.05	ZR
MOL246	ZINC04081584	13.09	0.39	ZR
MOL247	p-mentha-1,5-dien-8-ol	28.63	0.03	ZR
MOL248	himachalene	17.59	0.08	ZR
MOL249	2,6-Nonamethylene pyridine	68.94	0.09	ZR
MOL250	(2R)-2,6-dimethylhept-5-enal	28.86	0.02	ZR
MOL251	(2R)-heptan-2-ol	24.38	0.01	ZR
MOL252	(2S)-2-methylpentanal	63.34	0.01	ZR
MOL253	Methylbutenol	54.58	0.01	ZR/ASR
MOL254	2-Methylhept-2-ene	25.56	0.01	ZR
MOL255	()-beta-Citronellene	23.21	0.01	ZR
MOL256	1-(4-Hydroxy-3-methoxyphenyl)decan-5-one	7.55	0.14	ZR
MOL257	Isovaleral	44.71	0	ZR
MOL258	4-(1,5-Dimethylhex-4-enyl)cyclohex-2-enone	45.5	0.06	ZR
MOL259	4-Gingerol	8.62	0.12	ZR
MOL260	5-hydroxy-7-(4-hydroxyphenyl)-1-(4-hydroxy-3-methoxyphenyl)-3-heptanone	5.34	0.32	ZR
MOL261	6-Gingerdione	8.87	0.16	ZR
MOL262	[(3S)-3,7-dimethyloct-7-enyl] acetate	31.38	0.04	ZR
MOL263	6-gingediacetate	6.71	0.29	ZR
MOL264	6-gingediol-3-acetate	7.11	0.22	ZR
MOL265	6-gingediol-5-acetate	7.06	0.23	ZR
MOL266	6-gingediol	6.02	0.16	ZR
MOL267	6-gingesulfonic acid	8.56	0.23	ZR
MOL268	6-shogaol	31	0.14	ZR
MOL269	Sulcatone	26.36	0.01	ZR
MOL270	(8)-Gingerol	7.01	0.22	ZR
MOL271	PGR	46.54	0	ZR
MOL272	Bicyclo[3. 1. 0]hex-2-ene,4-methyl-1-(1-methylethyl)-	50.91	0.04	ZR
MOL273	Campherenol	18.25	0.09	ZR
MOL274	[(1S)-3-[(E)-but-2-enyl]-2-methyl-4-oxo-1-cyclopent-2-enyl] (1R,3R)-3-[(E)-3-methoxy-2-methyl-3-oxoprop-1-enyl]-2,2-dimethylcyclopropane-1-carboxylate	62.52	0.31	ZR
MOL275	copaene	24.08	0.12	ZR/ZR
MOL276	Cynanuriculoside A	14.92	0.03	ZR
MOL277	Peruviol	29.61	0.06	ZR
MOL278	C10230	3.01	0.02	ZR
MOL279	Gingerenone A	4.2	0.38	ZR
MOL280	Gingerenone B	3.79	0.46	ZR
MOL281	Gingerenone-C	4.39	0.3	ZR
MOL282	Ginkgetin	22.19	0.59	ZR
MOL283	Heptaphylline	14.81	0.25	ZR
MOL284	Isoginkgetin	21.56	0.58	ZR
MOL285	Mesotrihydroxypiperidine	50.1	0.02	ZR
MOL286	Xanthorrhizol	32.1	0.07	ZR
MOL287	Sexangularetin	62.86	0.3	ZR
MOL288	Shyobunone	44.28	0.07	ZR
MOL289	zingerone	25.23	0.05	ZR
MOL290	Zingiberoside A3	27.64	0.06	ZR
MOL291	Zingiberoside A3_qt	14.15	0.81	ZR
MOL292	Decamethylenediol	26.51	0.03	ZR
MOL293	.beta.-Fenchyl acetate, exo-	108.68	0.07	ZR
MOL294	beta-Curcumene	4.48	0.06	ZR
MOL295	beta-Rhodinol	38.05	0.02	ZR
MOL296	Tereben	29.62	0.02	ZR
MOL297	beta-Citronellol	38.89	0.02	ZR
MOL298	(1S,5S)-1-isopropyl-4-methylenebicyclo[3.1.0]hexane	46.21	0.04	ZR
MOL299	alpha-Curcumene	4.68	0.06	ZR
MOL300	beta-Eudesmol	26.09	0.1	ZR
MOL301	2-[(1R,3S,4S)-3-isopropenyl-4-methyl-4-vinylcyclohexyl]propan-2-ol	19.03	0.07	ZR
MOL302	Sitogluside	20.63	0.62	ZR/CR/ASR
MOL303	beta-sitosterol	36.91	0.75	ZR/ASR
MOL304	sitosterol	36.91	0.75	ZR
MOL305	Farnesene	17.42	0.05	ZR/ASR
MOL306	(1S,4aR,8aR)-1-isopropyl-7-methyl-4-methylene-2,3,4a,5,6,8a-hexahydro-1H-naphthalene	19.8	0.08	ZR/ASR
MOL307	Neryl acetate	57.47	0.04	ZR
MOL308	(-)-alpha-cedrene	55.56	0.1	ZR
MOL309	hexanal	55.71	0.01	ZR
MOL310	oleic acid	33.13	0.14	ZR/CR
MOL311	DBP	64.54	0.13	ZR
MOL312	palmitic acid	19.3	0.1	ZR/ASR
MOL313	OYA	19.07	0.01	ZR
MOL314	o-Cymol	51.89	0.02	ZR
MOL315	Citraurin beta	20.53	0.56	ZR
MOL316	(-)-Citronellal	35.71	0.02	ZR
MOL317	Dekan	17.74	0.01	ZR
MOL318	Heptadekan	8.64	0.07	ZR
MOL319	LFA	8.46	0.13	ZR
MOL320	Henicosane	8.41	0.15	ZR
MOL321	methyl palmitate	18.09	0.12	ZR
MOL322	tetradecane	15.94	0.04	ZR
MOL323	(+)-alpha-Curcumene	26.56	0.06	ZR
MOL324	Zingiberene	18.8	0.06	ZR
MOL325	Terpilene	33.95	0.02	ZR
MOL326	tricyclene	36.11	0.07	ZR
MOL327	2-NONANONE	8.51	0.02	ZR
MOL328	Mnk	17.66	0.03	ZR
MOL329	cis-beta-farnesene	6.75	0.05	ZR
MOL330	alpha-Farnesene	21.7	0.05	ZR
MOL331	beta-Bisabolene	29.59	0.06	ZR
