# Supplementary material for: Network Pharmacology-Based Approach to Investigate the Analgesic Efficacy and Molecular Targets of Xuangui Dropping Pill for Treating Primary Dysmenorrhea
Source: Evid Based Complement Alternat Med. 2017 Oct 8;2017:7525179. doi: 10.1155/2017/7525179 (PMC5651156; doi:10.1155/2017/7525179)
Supplement: Supplementary file 2 [file 7525179.f2.xls]

## Sheet: Sheet1
Number	Dompound	Target	Gene
MOL003	berberine	Nitric oxide synthase, inducible	NOS2
		Androgen receptor	AR
		Coagulation factor Xa	F10
		Estrogen receptor	ESR1
		Nitric-oxide synthase, endothelial	NOS3
		Potassium voltage-gated channel subfamily H member 2	KCNH2
		Prostaglandin G/H synthase 1	PTGS1
		Prostaglandin G/H synthase 2	PTGS2
		Retinoic acid receptor RXR-alpha	RXRA
		Sodium channel protein type 5 subunit alpha	SCN5A
		Beta-2 adrenergic receptor	ADRB2
		Heat shock protein HSP 90	HSP90
		mRNA of PKA Catalytic Subunit C-alpha	PRKACA
		Trypsin-1	PRSS1
		Nuclear receptor coactivator 2	NCOA2
		cAMP and cAMP-inhibited cGMP 3',5'-cyclic phosphodiesterase 10A	PDE10A
		Calmodulin	CALM1
MOL005	coptisine	Nitric oxide synthase, inducible	NOS2
		Prostaglandin G/H synthase 1	PTGS1
		Potassium voltage-gated channel subfamily H member 2	KCNH2
		Estrogen receptor	ESR1
		Androgen receptor	AR
		Sodium channel protein type 5 subunit alpha	SCN5A
		Prostaglandin G/H synthase 2	PTGS2
		Nitric-oxide synthase, endothelial	NOS3
		Trypsin-1	PRSS1
MOL006	Cryptopin	Prostaglandin G/H synthase 1	PTGS1
		Dopamine D1 receptor	DRD1
		Muscarinic acetylcholine receptor M3	CHRM3
		Potassium voltage-gated channel subfamily H member 2	KCNH2
		Muscarinic acetylcholine receptor M1	CHRM1
		Sodium channel protein type 5 subunit alpha	SCN5A
		Coagulation factor Xa	F10
		Muscarinic acetylcholine receptor M5	CHRM5
		Prostaglandin G/H synthase 2	PTGS2
		5-hydroxytryptamine receptor 3A	HTR3A
		Coagulation factor VII	F7
		Vascular endothelial growth factor receptor 2	KDR
		Muscarinic acetylcholine receptor M4	CHRM4
		Delta-type opioid receptor	OPRD1
		CGMP-inhibited 3',5'-cyclic phosphodiesterase A	PDE3A
		Alpha-1B adrenergic receptor	ADRA1B
		Beta-2 adrenergic receptor	ADRB2
		Alpha-1D adrenergic receptor	ADRA1D
		DNA topoisomerase II	TOP2
		Mu-type opioid receptor	OPRM1
		Heat shock protein HSP 90	HSP90
		mRNA of PKA Catalytic Subunit C-alpha	PRKACA
		Voltage-dependent L-type calcium channel subunit alpha-1S	CACNA1S
		Nuclear receptor coactivator 1	NCOA1
		cAMP and cAMP-inhibited cGMP 3',5'-cyclic phosphodiesterase 10A	PDE10A
		Calmodulin	CALM1
		5-hydroxytryptamine 2A receptor	HTR2A
		Sodium-dependent serotonin transporter	SLC6A4
MOL007	Dihydrochelerythrine	Nitric oxide synthase, inducible	NOS2
		Prostaglandin G/H synthase 1	PTGS1
		Potassium voltage-gated channel subfamily H member 2	KCNH2
		Estrogen receptor	ESR1
		Androgen receptor	AR
		Sodium channel protein type 5 subunit alpha	SCN5A
		Peroxisome proliferator activated receptor gamma	PPARG
		Coagulation factor Xa	F10
		Prostaglandin G/H synthase 2	PTGS2
		Nitric-oxide synthase, endothelial	NOS3
		Retinoic acid receptor RXR-alpha	RXRA
		Acetylcholinesterase	ACHE
		Estrogen receptor beta	ESR2
		Mitogen-activated protein kinase 14	MAPK14
		Heat shock protein HSP 90	HSP90
		Cell division protein kinase 2	CDK2
		mRNA of PKA Catalytic Subunit C-alpha	PRKACA
		Trypsin-1	PRSS1
		Proto-oncogene serine/threonine-protein kinase Pim-1	PIM1
		Cyclin-A2	CCNA2
		Nuclear receptor coactivator 2	NCOA2
		Calmodulin	CALM1
MOL008	Dihydrosanguinarine	Nitric oxide synthase, inducible	NOS2
		Prostaglandin G/H synthase 1	PTGS1
		Estrogen receptor	ESR1
		Androgen receptor	AR
		Peroxisome proliferator activated receptor gamma	PPARG
		Coagulation factor Xa	F10
		Prostaglandin G/H synthase 2	PTGS2
		Acetylcholinesterase	ACHE
		Estrogen receptor beta	ESR2
		Mitogen-activated protein kinase 14	MAPK14
		Cell division protein kinase 2	CDK2
		mRNA of PKA Catalytic Subunit C-alpha	PRKACA
		Trypsin-1	PRSS1
		Proto-oncogene serine/threonine-protein kinase Pim-1	PIM1
		Cyclin-A2	CCNA2
		Nuclear receptor coactivator 2	NCOA2
		Calmodulin	CALM1
MOL009	sanguinarine	Prostaglandin G/H synthase 1	PTGS1
		Prostaglandin G/H synthase 2	PTGS2
		Retinoic acid receptor RXR-alpha	RXRA
		mRNA of PKA Catalytic Subunit C-alpha	PRKACA
MOL011	(S)-Scoulerine	Prostaglandin G/H synthase 1	PTGS1
		Dopamine D1 receptor	DRD1
		Muscarinic acetylcholine receptor M3	CHRM3
		Potassium voltage-gated channel subfamily H member 2	KCNH2
		Muscarinic acetylcholine receptor M1	CHRM1
		D(1B) dopamine receptor	DRD5
		Sodium channel protein type 5 subunit alpha	SCN5A
		Coagulation factor Xa	F10
		Muscarinic acetylcholine receptor M5	CHRM5
		Prostaglandin G/H synthase 2	PTGS2
		Alpha-2A adrenergic receptor	ADRA2A
		Carbonic anhydrase II	CA2
		Coagulation factor VII	F7
		Alpha-2C adrenergic receptor	ADRA2C
		Muscarinic acetylcholine receptor M4	CHRM4
		Delta-type opioid receptor	OPRD1
		CGMP-inhibited 3',5'-cyclic phosphodiesterase A	PDE3A
		5-hydroxytryptamine 2A receptor	HTR2A
		Alpha-1A adrenergic receptor	ADRA1A
		5-hydroxytryptamine 2C receptor	HTR2C
		Muscarinic acetylcholine receptor M2	CHRM2
		Alpha-1B adrenergic receptor	ADRA1B
		D(3) dopamine receptor	DRD3
		Sodium-dependent dopamine transporter	SLC6A3
		Beta-2 adrenergic receptor	ADRB2
		Alpha-1D adrenergic receptor	ADRA1D
		DNA topoisomerase II	TOP2
		Sodium-dependent serotonin transporter	SLC6A4
		Mu-type opioid receptor	OPRM1
		Heat shock protein HSP 90	HSP90
		Nuclear receptor coactivator 2	NCOA2
		Nuclear receptor coactivator 1	NCOA1
		Calmodulin	CALM1
		Retinoic acid receptor RXR-alpha	RXRA
		Sodium-dependent noradrenaline transporter	SLC6A2
		Alpha-2B adrenergic receptor	ADRA2B
MOL012	Cavidine	Prostaglandin G/H synthase 1	PTGS1
		Muscarinic acetylcholine receptor M3	CHRM3
		Potassium voltage-gated channel subfamily H member 2	KCNH2
		Muscarinic acetylcholine receptor M1	CHRM1
		Beta-1 adrenergic receptor	ADRB1
		Sodium channel protein type 5 subunit alpha	SCN5A
		Coagulation factor Xa	F10
		Muscarinic acetylcholine receptor M5	CHRM5
		Prostaglandin G/H synthase 2	PTGS2
		5-hydroxytryptamine receptor 3A	HTR3A
		Alpha-2C adrenergic receptor	ADRA2C
		Muscarinic acetylcholine receptor M4	CHRM4
		Retinoic acid receptor RXR-alpha	RXRA
		Delta-type opioid receptor	OPRD1
		5-hydroxytryptamine 2A receptor	HTR2A
		5-hydroxytryptamine 2C receptor	HTR2C
		Alpha-1B adrenergic receptor	ADRA1B
		Beta-2 adrenergic receptor	ADRB2
		Alpha-1D adrenergic receptor	ADRA1D
		DNA topoisomerase II	TOP2
		Mu-type opioid receptor	OPRM1
		Heat shock protein HSP 90	HSP90
		Retinoic acid receptor RXR-beta	RXRB
		Calmodulin	CALM1
		Dopamine D1 receptor	DRD1
		Sodium-dependent serotonin transporter	SLC6A4
		Coagulation factor VII	F7
		cAMP and cAMP-inhibited cGMP 3',5'-cyclic phosphodiesterase 10A	PDE10A
MOL014	(R)-Canadine	Prostaglandin G/H synthase 1	PTGS1
		Muscarinic acetylcholine receptor M3	CHRM3
		Potassium voltage-gated channel subfamily H member 2	KCNH2
		Muscarinic acetylcholine receptor M1	CHRM1
		Sodium channel protein type 5 subunit alpha	SCN5A
		Coagulation factor Xa	F10
		Muscarinic acetylcholine receptor M5	CHRM5
		Prostaglandin G/H synthase 2	PTGS2
		5-hydroxytryptamine receptor 3A	HTR3A
		Alpha-2C adrenergic receptor	ADRA2C
		Muscarinic acetylcholine receptor M4	CHRM4
		Delta-type opioid receptor	OPRD1
		5-hydroxytryptamine 2A receptor	HTR2A
		5-hydroxytryptamine 2C receptor	HTR2C
		Alpha-1B adrenergic receptor	ADRA1B
		Sodium-dependent dopamine transporter	SLC6A3
		Beta-2 adrenergic receptor	ADRB2
		Alpha-1D adrenergic receptor	ADRA1D
		Sodium-dependent serotonin transporter	SLC6A4
		Mu-type opioid receptor	OPRM1
		Heat shock protein HSP 90	HSP90
		mRNA of PKA Catalytic Subunit C-alpha	PRKACA
		cAMP and cAMP-inhibited cGMP 3',5'-cyclic phosphodiesterase 10A	PDE10A
		Calmodulin	CALM1
		Dopamine D1 receptor	DRD1
		D(1B) dopamine receptor	DRD5
		Retinoic acid receptor RXR-alpha	RXRA
		Sodium-dependent noradrenaline transporter	SLC6A2
		Alpha-1A adrenergic receptor	ADRA1A
		Muscarinic acetylcholine receptor M2	CHRM2
		Calcium-activated potassium channel subunit alpha 1	KCNMA1
MOL016	Tetrahydropalmatine	Dopamine D1 receptor	DRD1
		Muscarinic acetylcholine receptor M3	CHRM3
		Potassium voltage-gated channel subfamily H member 2	KCNH2
		Muscarinic acetylcholine receptor M1	CHRM1
		Sodium channel protein type 5 subunit alpha	SCN5A
		Coagulation factor Xa	F10
		Muscarinic acetylcholine receptor M5	CHRM5
		Prostaglandin G/H synthase 2	PTGS2
		5-hydroxytryptamine receptor 3A	HTR3A
		Carbonic anhydrase II	CA2
		Alpha-2C adrenergic receptor	ADRA2C
		Muscarinic acetylcholine receptor M4	CHRM4
		Delta-type opioid receptor	OPRD1
		5-hydroxytryptamine 2A receptor	HTR2A
		Sodium-dependent noradrenaline transporter	SLC6A2
		5-hydroxytryptamine 2C receptor	HTR2C
		Muscarinic acetylcholine receptor M2	CHRM2
		Alpha-1B adrenergic receptor	ADRA1B
		Sodium-dependent dopamine transporter	SLC6A3
		Beta-2 adrenergic receptor	ADRB2
		Alpha-1D adrenergic receptor	ADRA1D
		Sodium-dependent serotonin transporter	SLC6A4
		Mu-type opioid receptor	OPRM1
		Heat shock protein HSP 90	HSP90
		Retinoic acid receptor RXR-beta	RXRB
		Calmodulin	CALM1
		Prostaglandin G/H synthase 1	PTGS1
		Beta-1 adrenergic receptor	ADRB1
		Retinoic acid receptor RXR-alpha	RXRA
		D(3) dopamine receptor	DRD3
		D(2) dopamine receptor	DRD2
		Nuclear receptor coactivator 1	NCOA1
MOL017	(-)-alpha-N-methylcanadine	Muscarinic acetylcholine receptor M3	CHRM3
		Potassium voltage-gated channel subfamily H member 2	KCNH2
		Muscarinic acetylcholine receptor M1	CHRM1
		Sodium channel protein type 5 subunit alpha	SCN5A
		Coagulation factor Xa	F10
		Muscarinic acetylcholine receptor M5	CHRM5
		Prostaglandin G/H synthase 2	PTGS2
		Carbonic anhydrase II	CA2
		Muscarinic acetylcholine receptor M4	CHRM4
		Alpha-1B adrenergic receptor	ADRA1B
		Beta-2 adrenergic receptor	ADRB2
		Alpha-1D adrenergic receptor	ADRA1D
		Nuclear receptor coactivator 2	NCOA2
		Nuclear receptor coactivator 1	NCOA1
		Calmodulin	CALM1
MOL018	Capaurine	Prostaglandin G/H synthase 1	PTGS1
		Dopamine D1 receptor	DRD1
		Muscarinic acetylcholine receptor M3	CHRM3
		Potassium voltage-gated channel subfamily H member 2	KCNH2
		Muscarinic acetylcholine receptor M1	CHRM1
		Sodium channel protein type 5 subunit alpha	SCN5A
		Coagulation factor Xa	F10
		Muscarinic acetylcholine receptor M5	CHRM5
		Prostaglandin G/H synthase 2	PTGS2
		Nitric-oxide synthase, endothelial	NOS3
		Carbonic anhydrase II	CA2
		Vascular endothelial growth factor receptor 2	KDR
		Muscarinic acetylcholine receptor M4	CHRM4
		Retinoic acid receptor RXR-alpha	RXRA
		Delta-type opioid receptor	OPRD1
		5-hydroxytryptamine 2A receptor	HTR2A
		5-hydroxytryptamine 2C receptor	HTR2C
		Alpha-1B adrenergic receptor	ADRA1B
		Sodium-dependent dopamine transporter	SLC6A3
		Beta-2 adrenergic receptor	ADRB2
		Alpha-1D adrenergic receptor	ADRA1D
		DNA topoisomerase II	TOP2
		Sodium-dependent serotonin transporter	SLC6A4
		Mu-type opioid receptor	OPRM1
		Heat shock protein HSP 90	HSP90
		Retinoic acid receptor RXR-beta	RXRB
		Calcium-activated potassium channel subunit alpha 1	KCNMA1
		Calmodulin	CALM1
MOL020	Clarkeanidine	Prostaglandin G/H synthase 1	PTGS1
		Dopamine D1 receptor	DRD1
		Muscarinic acetylcholine receptor M3	CHRM3
		Potassium voltage-gated channel subfamily H member 2	KCNH2
		Muscarinic acetylcholine receptor M1	CHRM1
		Sodium channel protein type 5 subunit alpha	SCN5A
		Coagulation factor Xa	F10
		Muscarinic acetylcholine receptor M5	CHRM5
		Prostaglandin G/H synthase 2	PTGS2
		Carbonic anhydrase II	CA2
		Alpha-2C adrenergic receptor	ADRA2C
		Muscarinic acetylcholine receptor M4	CHRM4
		Retinoic acid receptor RXR-alpha	RXRA
		Delta-type opioid receptor	OPRD1
		5-hydroxytryptamine 2A receptor	HTR2A
		Sodium-dependent noradrenaline transporter	SLC6A2
		Alpha-1A adrenergic receptor	ADRA1A
		5-hydroxytryptamine 2C receptor	HTR2C
		Muscarinic acetylcholine receptor M2	CHRM2
		Alpha-2B adrenergic receptor	ADRA2B
		Alpha-1B adrenergic receptor	ADRA1B
		Sodium-dependent dopamine transporter	SLC6A3
		Beta-2 adrenergic receptor	ADRB2
		Alpha-1D adrenergic receptor	ADRA1D
		DNA topoisomerase II	TOP2
		Sodium-dependent serotonin transporter	SLC6A4
		Mu-type opioid receptor	OPRM1
		Heat shock protein HSP 90	HSP90
		mRNA of PKA Catalytic Subunit C-alpha	PRKACA
		Calmodulin	CALM1
MOL022	CORYDALINE	Dopamine D1 receptor	DRD1
		Muscarinic acetylcholine receptor M3	CHRM3
		Potassium voltage-gated channel subfamily H member 2	KCNH2
		Muscarinic acetylcholine receptor M1	CHRM1
		Sodium channel protein type 5 subunit alpha	SCN5A
		Muscarinic acetylcholine receptor M5	CHRM5
		Prostaglandin G/H synthase 2	PTGS2
		Carbonic anhydrase II	CA2
		Muscarinic acetylcholine receptor M4	CHRM4
		Retinoic acid receptor RXR-alpha	RXRA
		Delta-type opioid receptor	OPRD1
		5-hydroxytryptamine 2A receptor	HTR2A
		5-hydroxytryptamine 2C receptor	HTR2C
		Alpha-2B adrenergic receptor	ADRA2B
		Alpha-1B adrenergic receptor	ADRA1B
		Sodium-dependent dopamine transporter	SLC6A3
		Beta-2 adrenergic receptor	ADRB2
		Alpha-1D adrenergic receptor	ADRA1D
		DNA topoisomerase II	TOP2
		Sodium-dependent serotonin transporter	SLC6A4
		D(2) dopamine receptor	DRD2
		Mu-type opioid receptor	OPRM1
		Heat shock protein HSP 90	HSP90
		Retinoic acid receptor RXR-beta	RXRB
		Calmodulin	CALM1
MOL023	Corydalmine	Prostaglandin G/H synthase 1	PTGS1
		Muscarinic acetylcholine receptor M3	CHRM3
		Potassium voltage-gated channel subfamily H member 2	KCNH2
		Muscarinic acetylcholine receptor M1	CHRM1
		Estrogen receptor	ESR1
		Sodium channel protein type 5 subunit alpha	SCN5A
		Peroxisome proliferator activated receptor gamma	PPARG
		Coagulation factor Xa	F10
		Muscarinic acetylcholine receptor M5	CHRM5
		Prostaglandin G/H synthase 2	PTGS2
		Carbonic anhydrase II	CA2
		Alpha-2C adrenergic receptor	ADRA2C
		Muscarinic acetylcholine receptor M4	CHRM4
		Retinoic acid receptor RXR-alpha	RXRA
		Delta-type opioid receptor	OPRD1
		Acetylcholinesterase	ACHE
		Alpha-1B adrenergic receptor	ADRA1B
		Beta-2 adrenergic receptor	ADRB2
		Alpha-1D adrenergic receptor	ADRA1D
		Mu-type opioid receptor	OPRM1
		Heat shock protein HSP 90	HSP90
		Retinoic acid receptor RXR-beta	RXRB
		Proto-oncogene serine/threonine-protein kinase Pim-1	PIM1
		Nuclear receptor coactivator 2	NCOA2
		Nuclear receptor coactivator 1	NCOA1
		Calmodulin	CALM1
MOL024	Corydine	Prostaglandin G/H synthase 1	PTGS1
		Muscarinic acetylcholine receptor M3	CHRM3
		Potassium voltage-gated channel subfamily H member 2	KCNH2
		Muscarinic acetylcholine receptor M1	CHRM1
		Androgen receptor	AR
		Sodium channel protein type 5 subunit alpha	SCN5A
		Coagulation factor Xa	F10
		Muscarinic acetylcholine receptor M5	CHRM5
		Prostaglandin G/H synthase 2	PTGS2
		Retinoic acid receptor RXR-alpha	RXRA
		Delta-type opioid receptor	OPRD1
		Acetylcholinesterase	ACHE
		Alpha-1B adrenergic receptor	ADRA1B
		Beta-2 adrenergic receptor	ADRB2
		Alpha-1D adrenergic receptor	ADRA1D
		DNA topoisomerase II	TOP2
		Sodium-dependent serotonin transporter	SLC6A4
		Mu-type opioid receptor	OPRM1
		Pregnane X receptor	PXR
		Heat shock protein HSP 90	HSP90
		Calcium-activated potassium channel subunit alpha 1	KCNMA1
MOL025	18797-79-0	Prostaglandin G/H synthase 1	PTGS1
		Muscarinic acetylcholine receptor M3	CHRM3
		Muscarinic acetylcholine receptor M1	CHRM1
		Sodium channel protein type 5 subunit alpha	SCN5A
		Muscarinic acetylcholine receptor M5	CHRM5
		Prostaglandin G/H synthase 2	PTGS2
		Carbonic anhydrase II	CA2
		Delta-type opioid receptor	OPRD1
		Alpha-1B adrenergic receptor	ADRA1B
		DNA topoisomerase II	TOP2
		Mu-type opioid receptor	OPRM1
		Calmodulin	CALM1
MOL026	Corynoloxine	Prostaglandin G/H synthase 1	PTGS1
		Androgen receptor	AR
		Sodium channel protein type 5 subunit alpha	SCN5A
		Prostaglandin G/H synthase 2	PTGS2
		Delta-type opioid receptor	OPRD1
		Acetylcholinesterase	ACHE
		DNA topoisomerase II	TOP2
		Mu-type opioid receptor	OPRM1
MOL027	methyl-[2-(3,4,6,7-tetramethoxy-1-phenanthryl)ethyl]amine	Prostaglandin G/H synthase 1	PTGS1
		Potassium voltage-gated channel subfamily H member 2	KCNH2
		Sodium channel protein type 5 subunit alpha	SCN5A
		Prostaglandin G/H synthase 2	PTGS2
		Nitric-oxide synthase, endothelial	NOS3
		Retinoic acid receptor RXR-alpha	RXRA
		DNA topoisomerase II	TOP2
		Pregnane X receptor	PXR
		Heat shock protein HSP 90	HSP90
		Nuclear receptor coactivator 2	NCOA2
		Calmodulin	CALM1
MOL029	dehydrocavidine	Prostaglandin G/H synthase 1	PTGS1
		Dopamine D1 receptor	DRD1
		Muscarinic acetylcholine receptor M3	CHRM3
		Potassium voltage-gated channel subfamily H member 2	KCNH2
		Muscarinic acetylcholine receptor M1	CHRM1
		Sodium channel protein type 5 subunit alpha	SCN5A
		Coagulation factor Xa	F10
		Muscarinic acetylcholine receptor M5	CHRM5
		Prostaglandin G/H synthase 2	PTGS2
		Coagulation factor VII	F7
		Muscarinic acetylcholine receptor M4	CHRM4
		Retinoic acid receptor RXR-alpha	RXRA
		Delta-type opioid receptor	OPRD1
		5-hydroxytryptamine 2A receptor	HTR2A
		5-hydroxytryptamine 2C receptor	HTR2C
		Muscarinic acetylcholine receptor M2	CHRM2
		Alpha-1B adrenergic receptor	ADRA1B
		Beta-2 adrenergic receptor	ADRB2
		Alpha-1D adrenergic receptor	ADRA1D
		DNA topoisomerase II	TOP2
		Mu-type opioid receptor	OPRM1
		Heat shock protein HSP 90	HSP90
		Calmodulin	CALM1
MOL030	Dehydrocorybulbine	Nitric oxide synthase, inducible	NOS2
		Prostaglandin G/H synthase 1	PTGS1
		Potassium voltage-gated channel subfamily H member 2	KCNH2
		Estrogen receptor	ESR1
		Androgen receptor	AR
		Sodium channel protein type 5 subunit alpha	SCN5A
		Prostaglandin G/H synthase 2	PTGS2
		Retinoic acid receptor RXR-alpha	RXRA
		Mitogen-activated protein kinase 14	MAPK14
		Serine/threonine-protein kinase Chk1	CHEK1
		Trypsin-1	PRSS1
		Proto-oncogene serine/threonine-protein kinase Pim-1	PIM1
		Nuclear receptor coactivator 2	NCOA2
		Calmodulin	CALM1
		D(2) dopamine receptor	DRD2
MOL031	dehydrocorydaline	Nitric oxide synthase, inducible	NOS2
		Prostaglandin G/H synthase 1	PTGS1
		Potassium voltage-gated channel subfamily H member 2	KCNH2
		Estrogen receptor	ESR1
		Androgen receptor	AR
		Sodium channel protein type 5 subunit alpha	SCN5A
		Prostaglandin G/H synthase 2	PTGS2
		Retinoic acid receptor RXR-alpha	RXRA
		DNA topoisomerase II	TOP2
		Mitogen-activated protein kinase 14	MAPK14
		Serine/threonine-protein kinase Chk1	CHEK1
		Retinoic acid receptor RXR-beta	RXRB
		Trypsin-1	PRSS1
		Proto-oncogene serine/threonine-protein kinase Pim-1	PIM1
		Nuclear receptor coactivator 2	NCOA2
		cAMP and cAMP-inhibited cGMP 3',5'-cyclic phosphodiesterase 10A	PDE10A
		Calmodulin	CALM1
MOL032	Dehydrocorydalmine	Nitric oxide synthase, inducible	NOS2
		Prostaglandin G/H synthase 1	PTGS1
		Potassium voltage-gated channel subfamily H member 2	KCNH2
		Estrogen receptor	ESR1
		Androgen receptor	AR
		Sodium channel protein type 5 subunit alpha	SCN5A
		Prostaglandin G/H synthase 2	PTGS2
		Nitric-oxide synthase, endothelial	NOS3
		Coagulation factor VII	F7
		Retinoic acid receptor RXR-alpha	RXRA
		Beta-2 adrenergic receptor	ADRB2
		Estrogen receptor beta	ESR2
		Heat shock protein HSP 90	HSP90
		Cell division protein kinase 2	CDK2
		Trypsin-1	PRSS1
		Proto-oncogene serine/threonine-protein kinase Pim-1	PIM1
		Cyclin-A2	CCNA2
		Nuclear receptor coactivator 2	NCOA2
		Calcium-activated potassium channel subunit alpha 1	KCNMA1
		Calmodulin	CALM1
MOL035	demethylcorydalmatine	Prostaglandin G/H synthase 1	PTGS1
		Dopamine D1 receptor	DRD1
		Muscarinic acetylcholine receptor M3	CHRM3
		Potassium voltage-gated channel subfamily H member 2	KCNH2
		Muscarinic acetylcholine receptor M1	CHRM1
		Sodium channel protein type 5 subunit alpha	SCN5A
		Muscarinic acetylcholine receptor M5	CHRM5
		Prostaglandin G/H synthase 2	PTGS2
		Alpha-2C adrenergic receptor	ADRA2C
		Muscarinic acetylcholine receptor M4	CHRM4
		Delta-type opioid receptor	OPRD1
		Alpha-1B adrenergic receptor	ADRA1B
		Sodium-dependent dopamine transporter	SLC6A3
		Beta-2 adrenergic receptor	ADRB2
		Alpha-1D adrenergic receptor	ADRA1D
		Sodium-dependent serotonin transporter	SLC6A4
		Mu-type opioid receptor	OPRM1
		Heat shock protein HSP 90	HSP90
		Calmodulin	CALM1
MOL036	13-methyldehydrocorydalmine	Nitric oxide synthase, inducible	NOS2
		Prostaglandin G/H synthase 1	PTGS1
		Potassium voltage-gated channel subfamily H member 2	KCNH2
		Estrogen receptor	ESR1
		Androgen receptor	AR
		Prostaglandin G/H synthase 2	PTGS2
		Nitric-oxide synthase, endothelial	NOS3
		Retinoic acid receptor RXR-alpha	RXRA
		Mitogen-activated protein kinase 14	MAPK14
		Serine/threonine-protein kinase Chk1	CHEK1
		Trypsin-1	PRSS1
		Proto-oncogene serine/threonine-protein kinase Pim-1	PIM1
		Nuclear receptor coactivator 2	NCOA2
		Calmodulin	CALM1
MOL037	(1S,8'R)-6,7-dimethoxy-2-methylspiro[3,4-dihydroisoquinoline-1,7'-6,8-dihydrocyclopenta[g][1,3]benzodioxole]-8'-ol	Prostaglandin G/H synthase 1	PTGS1
		Muscarinic acetylcholine receptor M3	CHRM3
		Sodium channel protein type 5 subunit alpha	SCN5A
		Coagulation factor Xa	F10
		Muscarinic acetylcholine receptor M5	CHRM5
		Prostaglandin G/H synthase 2	PTGS2
		Delta-type opioid receptor	OPRD1
		Alpha-1B adrenergic receptor	ADRA1B
		Alpha-1D adrenergic receptor	ADRA1D
		DNA topoisomerase II	TOP2
		Mu-type opioid receptor	OPRM1
		Nuclear receptor coactivator 1	NCOA1
		Calmodulin	CALM1
MOL040	Izoteolin	Prostaglandin G/H synthase 1	PTGS1
		Muscarinic acetylcholine receptor M3	CHRM3
		Muscarinic acetylcholine receptor M1	CHRM1
		Androgen receptor	AR
		Sodium channel protein type 5 subunit alpha	SCN5A
		Muscarinic acetylcholine receptor M5	CHRM5
		Prostaglandin G/H synthase 2	PTGS2
		Muscarinic acetylcholine receptor M4	CHRM4
		Retinoic acid receptor RXR-alpha	RXRA
		Delta-type opioid receptor	OPRD1
		Acetylcholinesterase	ACHE
		Alpha-1B adrenergic receptor	ADRA1B
		Sodium-dependent dopamine transporter	SLC6A3
		Beta-2 adrenergic receptor	ADRB2
		Alpha-1D adrenergic receptor	ADRA1D
		DNA topoisomerase II	TOP2
		Sodium-dependent serotonin transporter	SLC6A4
		Mu-type opioid receptor	OPRM1
		Heat shock protein HSP 90	HSP90
		Nitric-oxide synthase, endothelial	NOS3
		Alpha-1A adrenergic receptor	ADRA1A
MOL041	isocorybulbine	Prostaglandin G/H synthase 1	PTGS1
		Muscarinic acetylcholine receptor M3	CHRM3
		Potassium voltage-gated channel subfamily H member 2	KCNH2
		Estrogen receptor	ESR1
		Sodium channel protein type 5 subunit alpha	SCN5A
		Prostaglandin G/H synthase 2	PTGS2
		Carbonic anhydrase II	CA2
		Retinoic acid receptor RXR-alpha	RXRA
		Delta-type opioid receptor	OPRD1
		Acetylcholinesterase	ACHE
		Alpha-1B adrenergic receptor	ADRA1B
		Beta-2 adrenergic receptor	ADRB2
		Alpha-1D adrenergic receptor	ADRA1D
		DNA topoisomerase II	TOP2
		Mu-type opioid receptor	OPRM1
		Retinoic acid receptor RXR-beta	RXRB
		Proto-oncogene serine/threonine-protein kinase Pim-1	PIM1
		Nuclear receptor coactivator 2	NCOA2
		Nuclear receptor coactivator 1	NCOA1
		Calmodulin	CALM1
MOL042	leonticine	Prostaglandin G/H synthase 1	PTGS1
		Dopamine D1 receptor	DRD1
		Muscarinic acetylcholine receptor M3	CHRM3
		Potassium voltage-gated channel subfamily H member 2	KCNH2
		Muscarinic acetylcholine receptor M1	CHRM1
		D(1B) dopamine receptor	DRD5
		Beta-1 adrenergic receptor	ADRB1
		Sodium channel protein type 5 subunit alpha	SCN5A
		Muscarinic acetylcholine receptor M5	CHRM5
		Prostaglandin G/H synthase 2	PTGS2
		Alpha-2A adrenergic receptor	ADRA2A
		Alpha-2C adrenergic receptor	ADRA2C
		Muscarinic acetylcholine receptor M4	CHRM4
		Retinoic acid receptor RXR-alpha	RXRA
		Delta-type opioid receptor	OPRD1
		CGMP-inhibited 3',5'-cyclic phosphodiesterase A	PDE3A
		5-hydroxytryptamine 2A receptor	HTR2A
		Sodium-dependent noradrenaline transporter	SLC6A2
		Alpha-1A adrenergic receptor	ADRA1A
		5-hydroxytryptamine 2C receptor	HTR2C
		Muscarinic acetylcholine receptor M2	CHRM2
		Alpha-2B adrenergic receptor	ADRA2B
		Alpha-1B adrenergic receptor	ADRA1B
		Sodium-dependent dopamine transporter	SLC6A3
		Beta-2 adrenergic receptor	ADRB2
		Alpha-1D adrenergic receptor	ADRA1D
		Sodium-dependent serotonin transporter	SLC6A4
		D(2) dopamine receptor	DRD2
		Mu-type opioid receptor	OPRM1
		Gamma-aminobutyric acid receptor subunit alpha-1	GABBR1
		5-hydroxytryptamine 1B receptor	HTR1B
		Beta-secretase	BACE
		Heat shock protein HSP 90	HSP90
		mRNA of PKA Catalytic Subunit C-alpha	PRKACA
		Calmodulin	CALM1
MOL043	13-methylpalmatrubine	Nitric oxide synthase, inducible	NOS2
		Prostaglandin G/H synthase 1	PTGS1
		Potassium voltage-gated channel subfamily H member 2	KCNH2
		Estrogen receptor	ESR1
		Androgen receptor	AR
		Sodium channel protein type 5 subunit alpha	SCN5A
		Prostaglandin G/H synthase 2	PTGS2
		Nitric-oxide synthase, endothelial	NOS3
		Retinoic acid receptor RXR-alpha	RXRA
		Mitogen-activated protein kinase 14	MAPK14
		Heat shock protein HSP 90	HSP90
		Serine/threonine-protein kinase Chk1	CHEK1
		Trypsin-1	PRSS1
		Proto-oncogene serine/threonine-protein kinase Pim-1	PIM1
		Nuclear receptor coactivator 2	NCOA2
		Calmodulin	CALM1
MOL047	N-methyllaurotetanine	Prostaglandin G/H synthase 1	PTGS1
		Muscarinic acetylcholine receptor M3	CHRM3
		Muscarinic acetylcholine receptor M1	CHRM1
		Androgen receptor	AR
		Sodium channel protein type 5 subunit alpha	SCN5A
		Muscarinic acetylcholine receptor M5	CHRM5
		Prostaglandin G/H synthase 2	PTGS2
		Nitric-oxide synthase, endothelial	NOS3
		Retinoic acid receptor RXR-alpha	RXRA
		Delta-type opioid receptor	OPRD1
		Alpha-1B adrenergic receptor	ADRA1B
		Beta-2 adrenergic receptor	ADRB2
		Alpha-1D adrenergic receptor	ADRA1D
		DNA topoisomerase II	TOP2
		Mu-type opioid receptor	OPRM1
		Heat shock protein HSP 90	HSP90
MOL048	norglaucing	Prostaglandin G/H synthase 1	PTGS1
		Muscarinic acetylcholine receptor M3	CHRM3
		Potassium voltage-gated channel subfamily H member 2	KCNH2
		Muscarinic acetylcholine receptor M1	CHRM1
		Androgen receptor	AR
		Sodium channel protein type 5 subunit alpha	SCN5A
		Coagulation factor Xa	F10
		Muscarinic acetylcholine receptor M5	CHRM5
		Prostaglandin G/H synthase 2	PTGS2
		Nitric-oxide synthase, endothelial	NOS3
		Retinoic acid receptor RXR-alpha	RXRA
		Delta-type opioid receptor	OPRD1
		Acetylcholinesterase	ACHE
		Alpha-1B adrenergic receptor	ADRA1B
		Beta-2 adrenergic receptor	ADRB2
		Alpha-1D adrenergic receptor	ADRA1D
		DNA topoisomerase II	TOP2
		Mu-type opioid receptor	OPRM1
		Heat shock protein HSP 90	HSP90
		Retinoic acid receptor RXR-beta	RXRB
		Nuclear receptor coactivator 1	NCOA1
MOL051	pontevedrine	Prostaglandin G/H synthase 1	PTGS1
		Potassium voltage-gated channel subfamily H member 2	KCNH2
		Coagulation factor Xa	F10
		Prostaglandin G/H synthase 2	PTGS2
		DNA topoisomerase II	TOP2
		Nuclear receptor coactivator 2	NCOA2
MOL052	pseudocoptisine	Nitric oxide synthase, inducible	NOS2
		Prostaglandin G/H synthase 1	PTGS1
		Estrogen receptor	ESR1
		Androgen receptor	AR
		Prostaglandin G/H synthase 2	PTGS2
		Trypsin-1	PRSS1
MOL053	24240-05-9	Prostaglandin G/H synthase 1	PTGS1
		Muscarinic acetylcholine receptor M3	CHRM3
		Potassium voltage-gated channel subfamily H member 2	KCNH2
		Muscarinic acetylcholine receptor M1	CHRM1
		Sodium channel protein type 5 subunit alpha	SCN5A
		Coagulation factor Xa	F10
		Muscarinic acetylcholine receptor M5	CHRM5
		Prostaglandin G/H synthase 2	PTGS2
		5-hydroxytryptamine receptor 3A	HTR3A
		Coagulation factor VII	F7
		Delta-type opioid receptor	OPRD1
		CGMP-inhibited 3',5'-cyclic phosphodiesterase A	PDE3A
		Alpha-1B adrenergic receptor	ADRA1B
		Alpha-1D adrenergic receptor	ADRA1D
		Mu-type opioid receptor	OPRM1
		Heat shock protein HSP 90	HSP90
		mRNA of PKA Catalytic Subunit C-alpha	PRKACA
		Calmodulin	CALM1
MOL055	saulatine	Muscarinic acetylcholine receptor M3	CHRM3
		Potassium voltage-gated channel subfamily H member 2	KCNH2
		Sodium channel protein type 5 subunit alpha	SCN5A
		Coagulation factor Xa	F10
		Muscarinic acetylcholine receptor M5	CHRM5
		Prostaglandin G/H synthase 2	PTGS2
		Alpha-1B adrenergic receptor	ADRA1B
MOL057	stylopine	Prostaglandin G/H synthase 1	PTGS1
		Muscarinic acetylcholine receptor M3	CHRM3
		Muscarinic acetylcholine receptor M1	CHRM1
		Sodium channel protein type 5 subunit alpha	SCN5A
		Muscarinic acetylcholine receptor M5	CHRM5
		Prostaglandin G/H synthase 2	PTGS2
		5-hydroxytryptamine receptor 3A	HTR3A
		Muscarinic acetylcholine receptor M4	CHRM4
		Delta-type opioid receptor	OPRD1
		5-hydroxytryptamine 2A receptor	HTR2A
		Alpha-1B adrenergic receptor	ADRA1B
		Sodium-dependent dopamine transporter	SLC6A3
		Beta-2 adrenergic receptor	ADRB2
		Alpha-1D adrenergic receptor	ADRA1D
		Mu-type opioid receptor	OPRM1
		Calmodulin	CALM1
		Retinoic acid receptor RXR-alpha	RXRA
MOL058	Tetrahydrocorysamine	Prostaglandin G/H synthase 1	PTGS1
		Muscarinic acetylcholine receptor M3	CHRM3
		Potassium voltage-gated channel subfamily H member 2	KCNH2
		Muscarinic acetylcholine receptor M1	CHRM1
		Sodium channel protein type 5 subunit alpha	SCN5A
		Muscarinic acetylcholine receptor M5	CHRM5
		Prostaglandin G/H synthase 2	PTGS2
		Muscarinic acetylcholine receptor M4	CHRM4
		Retinoic acid receptor RXR-alpha	RXRA
		Delta-type opioid receptor	OPRD1
		Alpha-1B adrenergic receptor	ADRA1B
		Beta-2 adrenergic receptor	ADRB2
		Alpha-1D adrenergic receptor	ADRA1D
		Mu-type opioid receptor	OPRM1
		Calmodulin	CALM1
MOL059	tetrahydroprotopapaverine	Dopamine D1 receptor	DRD1
		Muscarinic acetylcholine receptor M3	CHRM3
		Potassium voltage-gated channel subfamily H member 2	KCNH2
		Muscarinic acetylcholine receptor M1	CHRM1
		Beta-1 adrenergic receptor	ADRB1
		Sodium channel protein type 5 subunit alpha	SCN5A
		Coagulation factor Xa	F10
		Muscarinic acetylcholine receptor M5	CHRM5
		Prostaglandin G/H synthase 2	PTGS2
		Alpha-2C adrenergic receptor	ADRA2C
		Muscarinic acetylcholine receptor M4	CHRM4
		Retinoic acid receptor RXR-alpha	RXRA
		Delta-type opioid receptor	OPRD1
		Sodium-dependent noradrenaline transporter	SLC6A2
		5-hydroxytryptamine 2C receptor	HTR2C
		Alpha-1B adrenergic receptor	ADRA1B
		Sodium-dependent dopamine transporter	SLC6A3
		Beta-2 adrenergic receptor	ADRB2
		Alpha-1D adrenergic receptor	ADRA1D
		Sodium-dependent serotonin transporter	SLC6A4
		Mu-type opioid receptor	OPRM1
		Heat shock protein HSP 90	HSP90
		Calmodulin	CALM1
MOL060	ST057701	Prostaglandin G/H synthase 1	PTGS1
		Muscarinic acetylcholine receptor M3	CHRM3
		Potassium voltage-gated channel subfamily H member 2	KCNH2
		Muscarinic acetylcholine receptor M1	CHRM1
		Androgen receptor	AR
		Sodium channel protein type 5 subunit alpha	SCN5A
		Coagulation factor Xa	F10
		Muscarinic acetylcholine receptor M5	CHRM5
		Prostaglandin G/H synthase 2	PTGS2
		Nitric-oxide synthase, endothelial	NOS3
		Muscarinic acetylcholine receptor M4	CHRM4
		Retinoic acid receptor RXR-alpha	RXRA
		Delta-type opioid receptor	OPRD1
		5-hydroxytryptamine 2A receptor	HTR2A
		5-hydroxytryptamine 2C receptor	HTR2C
		Alpha-1B adrenergic receptor	ADRA1B
		Sodium-dependent dopamine transporter	SLC6A3
		Beta-2 adrenergic receptor	ADRB2
		Alpha-1D adrenergic receptor	ADRA1D
		DNA topoisomerase II	TOP2
		Sodium-dependent serotonin transporter	SLC6A4
		Mu-type opioid receptor	OPRM1
		Heat shock protein HSP 90	HSP90
		Trypsin-1	PRSS1
		Calmodulin	CALM1
MOL061	2,3,9,10-tetramethoxy-13-methyl-5,6-dihydroisoquinolino[2,1-b]isoquinolin-8-one	Nitric oxide synthase, inducible	NOS2
		Prostaglandin G/H synthase 1	PTGS1
		Potassium voltage-gated channel subfamily H member 2	KCNH2
		Androgen receptor	AR
		Sodium channel protein type 5 subunit alpha	SCN5A
		Coagulation factor Xa	F10
		Prostaglandin G/H synthase 2	PTGS2
		DNA topoisomerase II	TOP2
		Heat shock protein HSP 90	HSP90
		Serine/threonine-protein kinase Chk1	CHEK1
		Trypsin-1	PRSS1
		Nuclear receptor coactivator 2	NCOA2
		Calmodulin	CALM1
MOL065	palmatine	Nitric oxide synthase, inducible	NOS2
		Prostaglandin G/H synthase 1	PTGS1
		Potassium voltage-gated channel subfamily H member 2	KCNH2
		Estrogen receptor	ESR1
		Androgen receptor	AR
		Sodium channel protein type 5 subunit alpha	SCN5A
		Prostaglandin G/H synthase 2	PTGS2
		Nitric-oxide synthase, endothelial	NOS3
		Retinoic acid receptor RXR-alpha	RXRA
		Beta-2 adrenergic receptor	ADRB2
		Estrogen receptor beta	ESR2
		Heat shock protein HSP 90	HSP90
		Trypsin-1	PRSS1
		Proto-oncogene serine/threonine-protein kinase Pim-1	PIM1
		Nuclear receptor coactivator 2	NCOA2
		Calmodulin	CALM1
		mRNA of PKA Catalytic Subunit C-alpha	PRKACA
		Cell division protein kinase 2	CDK2
		Coagulation factor VII	F7
MOL067	Fumarine	Prostaglandin G/H synthase 1	PTGS1
		Muscarinic acetylcholine receptor M3	CHRM3
		Potassium voltage-gated channel subfamily H member 2	KCNH2
		Muscarinic acetylcholine receptor M1	CHRM1
		Sodium channel protein type 5 subunit alpha	SCN5A
		Coagulation factor Xa	F10
		Muscarinic acetylcholine receptor M5	CHRM5
		Prostaglandin G/H synthase 2	PTGS2
		5-hydroxytryptamine receptor 3A	HTR3A
		Coagulation factor VII	F7
		Muscarinic acetylcholine receptor M4	CHRM4
		Delta-type opioid receptor	OPRD1
		5-hydroxytryptamine 2A receptor	HTR2A
		Alpha-1B adrenergic receptor	ADRA1B
		Beta-2 adrenergic receptor	ADRB2
		Alpha-1D adrenergic receptor	ADRA1D
		Mu-type opioid receptor	OPRM1
		Heat shock protein HSP 90	HSP90
		mRNA of PKA Catalytic Subunit C-alpha	PRKACA
		Calmodulin	CALM1
		Sodium-dependent serotonin transporter	SLC6A4
		Voltage-dependent L-type calcium channel subunit alpha-1S	CACNA1S
		CGMP-inhibited 3',5'-cyclic phosphodiesterase A	PDE3A
		Sodium-dependent dopamine transporter	SLC6A3
		Type IV phosphodiesterase	PDE4D
		DNA topoisomerase II	TOP2
		Dopamine D1 receptor	DRD1
		Vascular endothelial growth factor receptor 2	KDR
MOL068	Isocorypalmine	Prostaglandin G/H synthase 1	PTGS1
		Dopamine D1 receptor	DRD1
		Muscarinic acetylcholine receptor M3	CHRM3
		Potassium voltage-gated channel subfamily H member 2	KCNH2
		Muscarinic acetylcholine receptor M1	CHRM1
		D(1B) dopamine receptor	DRD5
		Sodium channel protein type 5 subunit alpha	SCN5A
		Coagulation factor Xa	F10
		Muscarinic acetylcholine receptor M5	CHRM5
		Prostaglandin G/H synthase 2	PTGS2
		5-hydroxytryptamine receptor 3A	HTR3A
		Carbonic anhydrase II	CA2
		Alpha-2C adrenergic receptor	ADRA2C
		Muscarinic acetylcholine receptor M4	CHRM4
		Retinoic acid receptor RXR-alpha	RXRA
		Delta-type opioid receptor	OPRD1
		5-hydroxytryptamine 2A receptor	HTR2A
		Sodium-dependent noradrenaline transporter	SLC6A2
		Alpha-1A adrenergic receptor	ADRA1A
		5-hydroxytryptamine 2C receptor	HTR2C
		Muscarinic acetylcholine receptor M2	CHRM2
		Alpha-2B adrenergic receptor	ADRA2B
		Alpha-1B adrenergic receptor	ADRA1B
		D(3) dopamine receptor	DRD3
		Sodium-dependent dopamine transporter	SLC6A3
		Beta-2 adrenergic receptor	ADRB2
		Alpha-1D adrenergic receptor	ADRA1D
		Sodium-dependent serotonin transporter	SLC6A4
		Mu-type opioid receptor	OPRM1
		Heat shock protein HSP 90	HSP90
		mRNA of PKA Catalytic Subunit C-alpha	PRKACA
		Retinoic acid receptor RXR-beta	RXRB
		Ig gamma-1 chain C region	IGHG1
		Nuclear receptor coactivator 1	NCOA1
		Calmodulin	CALM1
		Calcium-activated potassium channel subunit alpha 1	KCNMA1
MOL069	bicuculline	Prostaglandin G/H synthase 1	PTGS1
		Thrombin	F2
		Potassium voltage-gated channel subfamily H member 2	KCNH2
		Androgen receptor	AR
		Sodium channel protein type 5 subunit alpha	SCN5A
		Coagulation factor Xa	F10
		Prostaglandin G/H synthase 2	PTGS2
		Vascular endothelial growth factor receptor 2	KDR
		Acetylcholinesterase	ACHE
		DNA topoisomerase II	TOP2
		Heat shock protein HSP 90	HSP90
		mRNA of Protein-tyrosine phosphatase, non-receptor type 1	PTPN1
		mRNA of PKA Catalytic Subunit C-alpha	PRKACA
		Proto-oncogene c-Fos	FOS
		Gap junction alpha-1 protein	GJA1
		Gamma-aminobutyric acid type B receptor subunit 1	GABBR1
		Bone morphogenetic protein receptor type-2	BMPR2
		Metabotropic glutamate receptor 5	GRM5
		Progonadoliberin-1	GNRH1
		Aldehyde dehydrogenase, dimeric NADP-preferring	ALDH3A1
		Gonadotropin-releasing hormone receptor	GNRHR
		Corticoliberin	CRH
		Glutamate [NMDA] receptor subunit epsilon-4	GRIN2D
		Sodium-dependent noradrenaline transporter	SLC6A2
		Gap junction beta-1 protein	GJB1
		Metabotropic glutamate receptor 1	GRM1
		Transitional endoplasmic reticulum ATPase	VCP
MOL071	C09367	Prostaglandin G/H synthase 1	PTGS1
		Muscarinic acetylcholine receptor M3	CHRM3
		Potassium voltage-gated channel subfamily H member 2	KCNH2
		Muscarinic acetylcholine receptor M1	CHRM1
		Androgen receptor	AR
		Sodium channel protein type 5 subunit alpha	SCN5A
		Coagulation factor Xa	F10
		Muscarinic acetylcholine receptor M5	CHRM5
		Prostaglandin G/H synthase 2	PTGS2
		Nitric-oxide synthase, endothelial	NOS3
		Retinoic acid receptor RXR-alpha	RXRA
		Delta-type opioid receptor	OPRD1
		Alpha-1B adrenergic receptor	ADRA1B
		Beta-2 adrenergic receptor	ADRB2
		Alpha-1D adrenergic receptor	ADRA1D
		DNA topoisomerase II	TOP2
		Mu-type opioid receptor	OPRM1
		Calmodulin	CALM1
		Muscarinic acetylcholine receptor M4	CHRM4
MOL072	quercetin	Prostaglandin G/H synthase 1	PTGS1
		Androgen receptor	AR
		Peroxisome proliferator activated receptor gamma	PPARG
		Prostaglandin G/H synthase 2	PTGS2
		Heat shock protein HSP 90	HSP90
		Phosphatidylinositol-4,5-bisphosphate 3-kinase catalytic subunit, gamma isoform	PIK3CA
		Nuclear receptor coactivator 2	NCOA2
		Dipeptidyl peptidase IV	DPP4
		Aldose reductase	AKR1B1
		Trypsin-1	PRSS1
		DNA topoisomerase II	TOP2
		Thrombin	F2
		Potassium voltage-gated channel subfamily H member 2	KCNH2
		Sodium channel protein type 5 subunit alpha	SCN5A
		Coagulation factor Xa	F10
		Beta-2 adrenergic receptor	ADRB2
		Stromelysin-1	MMP3
		mRNA of PKA Catalytic Subunit C-alpha	PRKACA
		Coagulation factor VII	F7
		Nitric-oxide synthase, endothelial	NOS3
		Retinoic acid receptor RXR-alpha	RXRA
		Acetylcholinesterase	ACHE
		Gamma-aminobutyric acid receptor subunit alpha-1	GABBR1
		Amine oxidase [flavin-containing] B	MAOB
		Transcription factor p65	RELA
		Epidermal growth factor receptor	EGFR
		RAC-alpha serine/threonine-protein kinase	AKT1
		Vascular endothelial growth factor A	VEGFA
		G1/S-specific cyclin-D1	CCND1
		Apoptosis regulator Bcl-2	BCL2
		Bcl-2-like protein 1	BCL2L1
		Proto-oncogene c-Fos	FOS
		Cyclin-dependent kinase inhibitor 1	CDKN1A
		Eukaryotic translation initiation factor 6	EIF6
		Apoptosis regulator BAX	BAX
		Caspase-9	CASP9
		Urokinase-type plasminogen activator	PLAU
		72 kDa type IV collagenase	MMP2
		Matrix metalloproteinase-9	MMP9
		Mitogen-activated protein kinase 1	MAPK1
		Interleukin-10	IL10
		Pro-epidermal growth factor	EGF
		Retinoblastoma-associated protein	RB1
		Tumor necrosis factor	TNF
		Transcription factor AP-1	JUN
		Interleukin-6	IL6
		Cyclin-dependent kinase inhibitor 2A, isoforms 1/2/3	PAL_GLEAN10005878
		Activator of 90 kDa heat shock protein ATPase homolog 1	AHSA1
		Caspase-3	CASP3
		Cellular tumor antigen p53	TP53
		ETS domain-containing protein Elk-1	ELK1
		NF-kappa-B inhibitor alpha	NFKBIA
		NADPH--cytochrome P450 reductase	POR
		Ornithine decarboxylase	ODC1
		Xanthine dehydrogenase/oxidase	XDH
		Caspase-8	CASP8
		DNA topoisomerase 1	TOP1
		RAF proto-oncogene serine/threonine-protein kinase	RAF1
		Superoxide dismutase [Cu-Zn]	SOD1
		Protein kinase C alpha type	PRKCA
		Interstitial collagenase	MMP1
		Hypoxia-inducible factor 1-alpha	HIF1A
		Signal transducer and activator of transcription 1-alpha/beta	STAT1
		Protein CBFA2T1	RUNX1T1
		Probable E3 ubiquitin-protein ligase HERC5	HERC5
		Cell division control protein 2 homolog	CDK1
		78 kDa glucose-regulated protein	HSPA5
		Receptor tyrosine-protein kinase erbB-2	ERBB2
		Peroxisome proliferator-activated receptor gamma	PPARG
		Acetyl-CoA carboxylase 1	ACACA
		Heme oxygenase 1	HMOX1
		Cytochrome P450 3A4	CYP3A4
		Cytochrome P450 1A2	CYP1A2
		Caveolin-1	CAV1
		Myc proto-oncogene protein	MYC
		Tissue factor	F3
		Gap junction alpha-1 protein	GJA1
		Cytochrome P450 1A1	CYP1A1
		Intercellular adhesion molecule 1	ICAM1
		Interleukin-1 beta	IL1B
		C-C motif chemokine 2	CCL2
		E-selectin	SELE
		Vascular cell adhesion protein 1	VCAM1
		Prostaglandin E2 receptor EP3 subtype	PTGER3
		Interleukin-8	CXCL8
		Protein kinase C beta type	PRKCB
		Baculoviral IAP repeat-containing protein 5	BIRC5
		Dual oxidase 2	DUOX2
		Nitric oxide synthase, endothelial	NOS3
		Heat shock protein beta-1	HSPB1
		Transforming growth factor beta-1	TGFB1
		Estrogen sulfotransferase	SULT1E1
		Maltase-glucoamylase, intestinal	MGAM
		Interleukin-2	IL2
		Nuclear receptor subfamily 1 group I member 2	NR1I2
		Cytochrome P450 1B1	CYP1B1
		G2/mitotic-specific cyclin-B1	CCNB1
		Tissue-type plasminogen activator	PLAT
		Thrombomodulin	THBD
		Plasminogen activator inhibitor 1	SERPINE1
		Collagen alpha-1(I) chain	COL1A1
		Interferon gamma	IFNG
		Arachidonate 5-lipoxygenase	ALOX5
		Phosphatidylinositol-3,4,5-trisphosphate 3-phosphatase and dual-specificity protein phosphatase PTEN	PTEN
		Interleukin-1 alpha	IL1A
		Myeloperoxidase	MPO
		DNA topoisomerase 2-alpha	TOP2A
		Neutrophil cytosol factor 1	NCF1
		ATP-binding cassette sub-family G member 2	ABCG2
		Hyaluronan synthase 2	HAS2
		Glutathione S-transferase P	GSTP1
		Nuclear factor erythroid 2-related factor 2	NFE2L2
		NAD(P)H dehydrogenase [quinone] 1	NQO1
		Poly [ADP-ribose] polymerase 1	PARP1
		Aryl hydrocarbon receptor	AHR
		26S proteasome non-ATPase regulatory subunit 3	PSMD3
		Solute carrier family 2, facilitated glucose transporter member 4	SLC2A4
		Collagen alpha-1(III) chain	COL3A1
		DNA gyrase subunit B	gyrB
		C-X-C motif chemokine 11	CXCL11
		C-X-C motif chemokine 2	CXCL2
		DDB1- and CUL4-associated factor 5	DCAF5
		Nuclear receptor subfamily 1 group I member 3	NR1I3
		Serine/threonine-protein kinase Chk2	CHEK2
		Insulin receptor	INSR
		Claudin-4	CLDN4
		Peroxisome proliferator-activated receptor alpha	PPARA
		Peroxisome proliferator-activated receptor delta	PPARD
		Heat shock factor protein 1	HSPB1
		C-reactive protein	CRP
		C-X-C motif chemokine 10	CXCL10
		Inhibitor of nuclear factor kappa-B kinase subunit alpha	CHUK
		Osteopontin	SPP1
		Runt-related transcription factor 2	RUNX2
		Ras association domain-containing protein 1	RASSF1
		Transcription factor E2F1	E2F1
		Transcription factor E2F2	E2F2
		Prostatic acid phosphatase	ACPP
		Cathepsin D	CTSD
		Insulin-like growth factor-binding protein 3	IGFBP3
		Insulin-like growth factor II	IGF2
		CD40 ligand	CD40LG
		Interferon regulatory factor 1	IRF1
		Receptor tyrosine-protein kinase erbB-3	ERBB3
		Serum paraoxonase/arylesterase 1	PON1
		Type I iodothyronine deiodinase	DIO1
		Procollagen C-endopeptidase enhancer 1	PCOLCE
		Puromycin-sensitive aminopeptidase	NPEPPS
		Hexokinase-2	HK2
		Homeobox protein Nkx-3.1	NKX3-1
		Ras GTPase-activating protein 1	RASA1
		Peroxidase C1A	PRXC1A
		Glutathione S-transferase Mu 1	GSTM1
		Glutathione S-transferase Mu 2	GSTM2
MOL124	Stigmasterol	Progesterone receptor	PGR
		Mineralocorticoid receptor	NR3C2
		Nuclear receptor coactivator 2	NCOA2
		Alcohol dehydrogenase 1C	ADH1C
		Ig gamma-1 chain C region	IGHG1
		Retinoic acid receptor RXR-alpha	RXRA
		Nuclear receptor coactivator 1	NCOA1
		Prostaglandin G/H synthase 1	PTGS1
		Prostaglandin G/H synthase 2	PTGS2
		Alpha-2A adrenergic receptor	ADRA2A
		Sodium-dependent noradrenaline transporter	SLC6A2
		Sodium-dependent dopamine transporter	SLC6A3
		Beta-2 adrenergic receptor	ADRB2
		Aldose reductase	AKR1B1
		Urokinase-type plasminogen activator	PLAU
		Leukotriene A-4 hydrolase	LTA4H
		Amine oxidase [flavin-containing] B	MAOB
		Amine oxidase [flavin-containing] A	MAOA
		mRNA of PKA Catalytic Subunit C-alpha	PRKACA
		Chymotrypsinogen B	CTRB1
		Muscarinic acetylcholine receptor M3	CHRM3
		Muscarinic acetylcholine receptor M1	CHRM1
		Beta-1 adrenergic receptor	ADRB1
		Sodium channel protein type 5 subunit alpha	SCN5A
		5-hydroxytryptamine 2A receptor	HTR2A
		Alpha-1A adrenergic receptor	ADRA1A
		Gamma-aminobutyric-acid receptor alpha-3 subunit	GABRA3
		Muscarinic acetylcholine receptor M2	CHRM2
		Alpha-1B adrenergic receptor	ADRA1B
		Gamma-aminobutyric acid receptor subunit alpha-1	GABBR1
		Neuronal acetylcholine receptor protein, alpha-7 chain	CHRNA7
MOL148	2,6-di(phenyl)thiopyran-4-thione	Prostaglandin G/H synthase 1	PTGS1
		Estrogen receptor	ESR1
		Prostaglandin G/H synthase 2	PTGS2
		CGMP-inhibited 3',5'-cyclic phosphodiesterase A	PDE3A
MOL236	1-Monolinolein	Prostaglandin G/H synthase 1	PTGS1
MOL239	6-gingerol	Muscarinic acetylcholine receptor M1	CHRM1
		Estrogen receptor	ESR1
		Beta-1 adrenergic receptor	ADRB1
		Sodium channel protein type 5 subunit alpha	SCN5A
		Acetylcholinesterase	ACHE
		CGMP-inhibited 3',5'-cyclic phosphodiesterase A	PDE3A
		Sodium-dependent noradrenaline transporter	SLC6A2
		Alpha-1A adrenergic receptor	ADRA1A
		Alpha-1B adrenergic receptor	ADRA1B
		Sodium-dependent dopamine transporter	SLC6A3
		Beta-2 adrenergic receptor	ADRB2
		Sodium-dependent serotonin transporter	SLC6A4
		Beta-lactamase	blaZ
		Leukotriene A-4 hydrolase	LTA4H
		Transcription factor p65	RELA
		Apoptosis regulator Bcl-2	BCL2
		Apoptosis regulator BAX	BAX
		Caspase-9	CASP9
		72 kDa type IV collagenase	MMP2
		Matrix metalloproteinase-9	MMP9
		Transcription factor AP-1	JUN
		Caspase-3	CASP3
		Cellular tumor antigen p53	TP53
		Prostaglandin G/H synthase 2	PTGS2
		Peroxisome proliferator-activated receptor gamma	PPARG
		Baculoviral IAP repeat-containing protein 5	BIRC5
MOL274	[(1S)-3-[(E)-but-2-enyl]-2-methyl-4-oxo-1-cyclopent-2-enyl] (1R,3R)-3-[(E)-3-methoxy-2-methyl-3-oxoprop-1-enyl]-2,2-dimethylcyclopropane-1-carboxylate	Prostaglandin G/H synthase 2	PTGS2
		Carbonic anhydrase II	CA2
		Nuclear receptor coactivator 2	NCOA2
MOL287	Sexangularetin	Nitric oxide synthase, inducible	NOS2
		Prostaglandin G/H synthase 1	PTGS1
		Androgen receptor	AR
		Prostaglandin G/H synthase 2	PTGS2
		Dipeptidyl peptidase IV	DPP4
		Heat shock protein HSP 90	HSP90
		Cell division protein kinase 2	CDK2
		Phosphatidylinositol-4,5-bisphosphate 3-kinase catalytic subunit, gamma isoform	PIK3CA
		Trypsin-1	PRSS1
MOL303	beta-sitosterol	Progesterone receptor	PGR
		Nuclear receptor coactivator 2	NCOA2
		Mineralocorticoid receptor	NR3C2
MOL304	sitosterol	Progesterone receptor	PGR
		Nuclear receptor coactivator 2	NCOA2
		Mineralocorticoid receptor	NR3C2
